# Supplementary material for: Zein-Induced Polyelectrolyte Complexes for Encapsulating Triterpenoid Phytochemicals
Source: PubMed Central journal article supplement — ACS Omega. 2023 Nov 13;8(47):44637–46. doi: 10.1021/acsomega.3c05157 (PMC10687950; doi:10.1021/acsomega.3c05157), 2023-11-13
Supplement: ao3c05157_si_001.pdf [file ao3c05157_si_001.pdf]

1

2 **Zein-induced Polyelectrolyte Complexes for Encapsulating Triterpenoid Phytochemicals**

3

4 Yong-Jin Kim<sup>1</sup>, Eun-Soo Lee<sup>1</sup>, Joonho Choi<sup>1</sup>, SeungHan Park<sup>1</sup>, Byungguen Chae<sup>1</sup>, Eunmi Kim<sup>1\*</sup>

5

6 *<sup>1</sup>Research and Innovation Unit, AMOREPACIFIC, 1920, Yonggu-daero, Giheung-gu, Yongin-si,*

7 *Gyeonggi-do, Republic of Korea*

8

9

---

\*[kchem10@gmail.com](mailto:kchem10@gmail.com) / [kchem2015@amorepacific.com](mailto:kchem2015@amorepacific.com)

10 **SUPPLEMENTARY MATERIALS**

11 **Figure S1.** Representative TEM image of nano ZiP complexes.

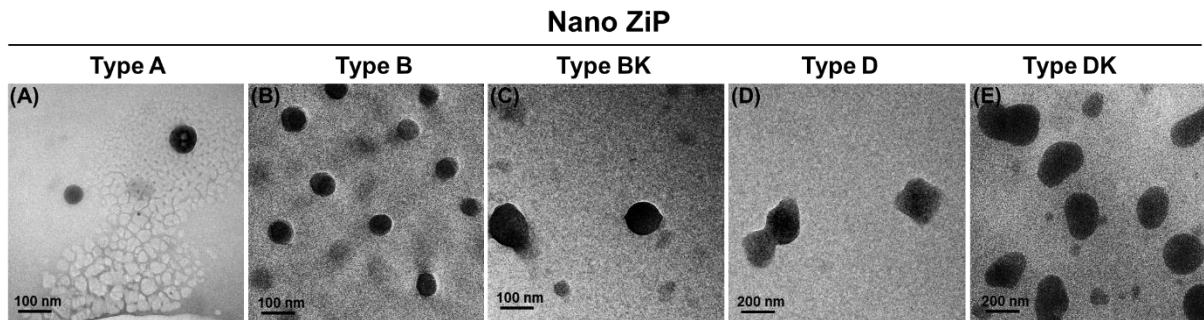

12

13 Transmission electron microscopy (TEM) images of nano-sized ZiP complex type A (A), type B (B),  
14 type BK (C), type D (D) and type DK (E). The scale bar indicates 100 nm in A–C and 200 nm in D and  
15 E.

16

17 **Figure S2. The phytochemical profiles of Compound K in hydrolyzed ginseng saponin were**  
18 **analyzed using HPLC.**

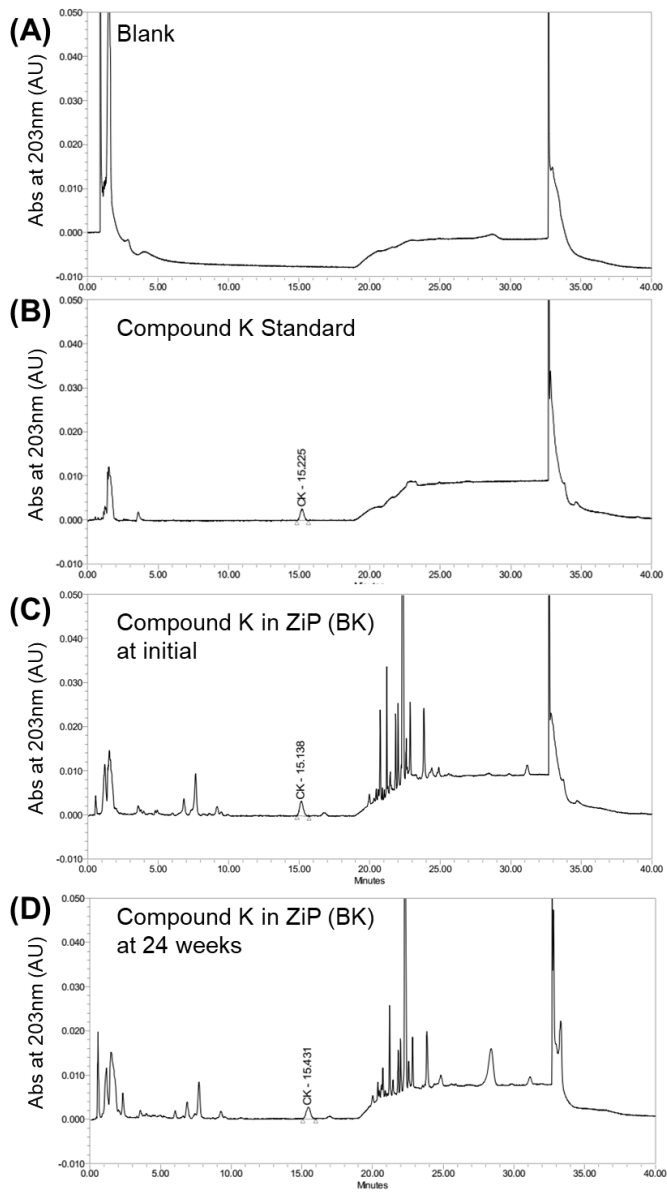

19  
20 The quantification analysis of Compound K was performed for Blank (A), single molecules as a  
21 standard molecule (B), Compound K in ZiP at initial (C), and after 24 weeks (D).

22

23 **Figure S3. Wound scratch assay comparing the quantitative regeneration of cells in the presence**  
 24 **of ZiP complexes (B type) and under untreated conditions, at time points ranging from 2 to 48**  
 25 **hours.**

| Wound Healing Area (%) |              |                 |                  |                  |                  |                  |
|------------------------|--------------|-----------------|------------------|------------------|------------------|------------------|
| Samples                |              | 2hrs            | 12hrs            | 16 hrs           | 32 hrs           | 48 hrs           |
| Control                | No treatment | 5.86 ± 0.64     | 15.56 ± 2.07     | 18.88 ± 2.13     | 27.14 ± 2.05     | 30.06 ± 0.77     |
| ZiP (%)                | 0.25         | 7.38 ± 2.01     | 19.08 ± 4.84     | 24.39 ± 5.36     | 36.87 ± 5.43 (*) | 41.88 ± 5.98 (*) |
|                        | 0.50         | 7.24 ± 0.34 (*) | 19.31 ± 1.45 (*) | 24.06 ± 2.19 (*) | 33.33 ± 4.42     | 37.35 ± 6.22     |
|                        | 1.00         | 7.81 ± 3.41     | 17.68 ± 4.71     | 21.15 ± 4.81     | 27.38 ± 5.75     | 29.49 ± 6.72     |

26 \*Significant differences compared to the wound healing area of untreated conditions with ZiP  
 27 complexes at each time point (p < 0.01).

28
